# Supplementary material
Source: Springer Nature journal article supplement (https://www.springermedizin.de/resource/supplementary/40248_2014_174_MOESM1_ESM.pdf/9686266)

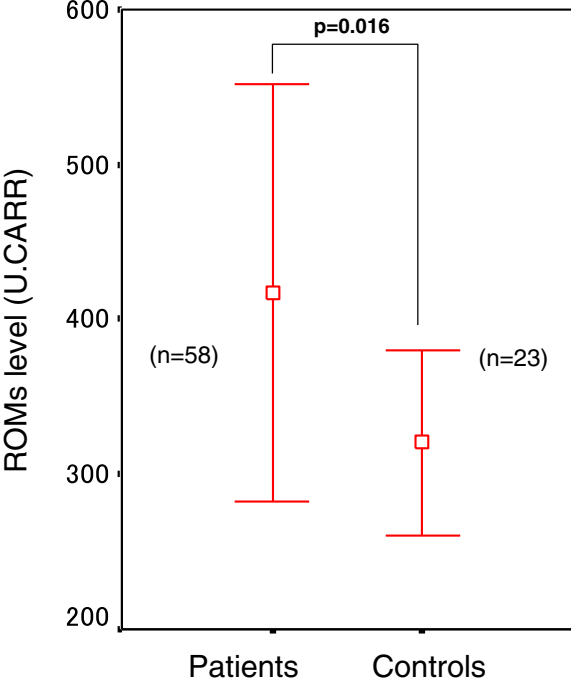

Supplement: MOESM1 [file 9686266]
